# Supplementary material for: Gender-Specific Metabolic Responses of Crassostrea hongkongensis to Infection with Vibrio harveyi and Lipopolysaccharide
Source: MDPI journal article supplement (doi:10.3390/antiox11061178), 2022-06-15
Supplement: s1 [file s1]

# **Gender-specific metabolic responses of *Crassostrea hongkongensis* to infection with *Vibrio harveyi* and lipopolysaccharide**

Lijuan Ma <sup>a, b</sup>, Jie Lu <sup>a \*</sup>, Tuo Yao <sup>a</sup>, Lingtong Ye <sup>c</sup>, Jiangyong Wang <sup>d \*</sup>

<sup>a</sup> *Key Laboratory of South China Sea Fishery Resources Exploitation & Utilization, Ministry of Agriculture, South China Sea Fisheries Research Institute, Chinese Academy of Fishery Sciences, Guangzhou 510300, China*

<sup>b</sup> *Chinese Academy of Agricultural Sciences, Beijing 100081, China*

<sup>c</sup> *Key Laboratory of Aquatic Product Processing, Ministry of Agriculture and Rural Affairs, South China Sea Fisheries Research Institute, Chinese Academy of Fishery Sciences, Guangzhou 510300, China*

<sup>d</sup> *Huizhou University, Huizhou 516007, China*

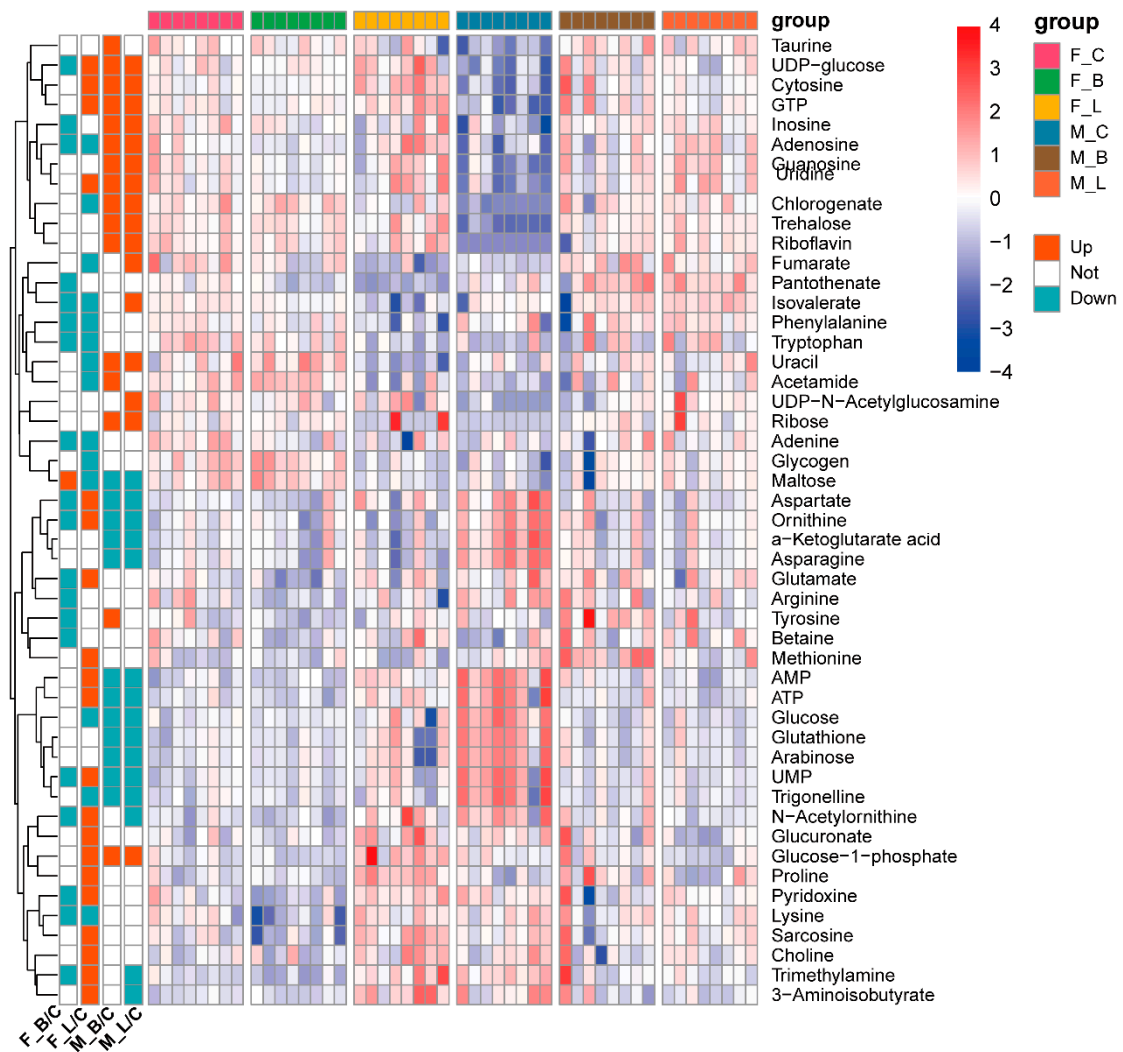

**Figure S1.** Heat map analysis of changes in metabolites of hepatopancreas tissues in male and female oysters under *Vibrio harveyi* and LPS infection compared to control groups. Groups: F, female; M, male; C, control; B, *V. harveyi* infection; L, LPS infection.



|                         |      |      |       |      |      |       |      |      |       |       |      |        |  |
|-------------------------|------|------|-------|------|------|-------|------|------|-------|-------|------|--------|--|
| Choline                 |      |      |       | 1.05 | 1.23 | 0.022 |      |      |       |       |      |        |  |
| Ornithine               | 0.92 | 2.34 | 0.009 | 1.12 | 1.51 | 0.012 | 0.83 | 1.47 | 0.017 | 0.83  | 1.28 | 0.003  |  |
| Lysine                  | 0.92 | 2.54 | 0.008 | 0.88 | 1.27 | 0.030 |      |      |       |       |      |        |  |
| $\alpha$ -Ketoglutarate |      |      |       |      |      |       | 0.87 | 1.24 | 0.002 | 0.86  | 1.12 | <0.001 |  |
| Asparagine              |      |      |       |      |      |       | 0.79 | 1.81 | 0.001 | 0.77  | 1.66 | <0.001 |  |
| Trimethylamine          | 0.91 | 2.14 | 0.034 | 1.19 | 2.60 | 0.003 |      |      |       | 0.864 | 1.15 | <0.001 |  |
| Aspartate               | 0.95 | 1.41 | 0.032 | 1.06 | 1.17 | 0.020 | 0.82 | 1.10 | 0.006 | 0.810 | 1.06 | 0.001  |  |
| Sarcosine               |      |      |       | 1.07 | 1.45 | 0.007 |      |      |       |       |      |        |  |
| 3-Aminoisobutyrate      |      |      |       | 1.31 | 2.65 | 0.001 |      |      |       | 0.83  | 1.25 | 0.016  |  |
| Glutamate               | 0.95 | 1.32 | 0.036 | 1.06 | 1.05 | 0.004 |      |      |       |       |      |        |  |
| Methionine              |      |      |       | 1.16 | 3.03 | 0.001 |      |      |       |       |      |        |  |
| Arginine                | 0.90 | 2.04 | 0.013 |      |      |       |      |      |       |       |      |        |  |
| Pantothenate            | 0.95 | 1.00 | 0.004 |      |      |       |      |      |       |       |      |        |  |
| Isovalerate             | 0.93 | 1.69 | 0.003 | 0.74 | 3.53 | 0.002 |      |      |       | 1.17  | 1.27 | 0.020  |  |

F, female group; M, male group; C, control group; B, *Vibrio harveyi* infection group; L, LPS infection group. <sup>a</sup> fold change. <sup>b</sup> variable importance in the projection. <sup>c</sup> *p*-value, representing the significance of the metabolite changes.
